# Supplementary material
Source: MDPI journal article supplement (https://www.mdpi.com/2077-0472/13/4/886)
Supplement: s1 [file s1]

**Table S1.** Effect of isolated bacterial strains on seed germination rate in glyphosate spiked sand

| <b>Bacterial strains</b> | <b>Seed germination (%)</b>   | <b>Seed germination (%)</b>    |
|--------------------------|-------------------------------|--------------------------------|
|                          | <b>100 mg/kg <sup>a</sup></b> | <b>200 mg /kg <sup>a</sup></b> |
| Control                  | 4 ± 0.57                      | 2 ± 0.57                       |
| WAG1                     | 5 ± 0                         | 3 ± 0                          |
| WAG2                     | 7 ± 0                         | 6 ± 0                          |
| WAG3                     | 5 ± 0.57                      | 4 ± 0                          |
| WAG4                     | 7 ± 0                         | 6 ± 0                          |
| WAG5                     | 6 ± 0                         | 5 ± 0                          |
| WAG6                     | 5 ± 0                         | 4 ± 0                          |
| WAG7                     | 5 ± 0                         | 3 ± 0.57                       |
| WAG8                     | 3 ± 0                         | 3 ± 0                          |
| WAG9                     | 7 ± 0                         | 5 ± 0                          |
| WAG10                    | 4 ± 0                         | 3 ± 0.57                       |
| WAG11                    | 7 ± 0                         | 5 ± 0                          |

<sup>a</sup> Results represent the mean value ± standard deviation
